# Supplementary material for: EV-Lev: extracellular vesicle isolation from human plasma using microfluidic magnetic levitation device
Source: Royal Society of Chemistry journal article supplement (doi:10.1039/d4lc00830h), 2025-01-01
Supplement: d4lc00830h1.pdf [file d4lc00830h1.pdf]

# Supporting Information

## **EV-Lev: Extracellular Vesicle Isolation from Human Plasma Using Microfluidic Magnetic Levitation Device**

Sena Yaman<sup>a</sup>, Tessa Devoe<sup>a,b</sup>, Ugur Aygun<sup>c</sup>, Ugur Parlatan<sup>c</sup>,  
Madhusudhan Reddy Bobbili<sup>c,d,e</sup>, Asma H. Karim<sup>c</sup>, Johannes Grillari<sup>d,e</sup>  
and Naside Gozde Durmus<sup>a\*</sup>

---

*a. Molecular Imaging Program at Stanford (MIPS), Department of Radiology, Stanford University, Stanford, CA 94305-5281, USA.*

*b. Brown University, Providence, RI 02912, USA.*

*c. Canary Center for Cancer Early Detection, Department of Radiology, Stanford University, Stanford, CA 94304, USA.*

*d. Institute of Molecular Biotechnology, Department of Biotechnology, BOKU University, 1190 Wien, Austria.*

*e. Ludwig Boltzmann Institute for Traumatology, The Research Center in Cooperation with AUVA, 1200 Wien, Austria.*

*\*Corresponding author: Naside Gozde Durmus, PhD, gdurmus@stanford.edu*

**Table S1.** Cost estimation for EV-Lev platform

| <b>Component</b> | <b>Price</b>     | <b>EV-Lev</b> | <b>Estimated Total</b> |
|------------------|------------------|---------------|------------------------|
|                  | Price (e.a.)     |               |                        |
| Magnet           | \$5.75           | \$11.50       |                        |
|                  | Price (50-piece) |               |                        |
| Mirror           | \$33             | \$1.32        |                        |
|                  | Price (e.a.)     |               |                        |
| Needle           | \$0.40           | \$0.80        |                        |
|                  | per sq ft        |               |                        |
| PMMA             | ~\$6             | ~\$0.5        |                        |
|                  | 100 ft           |               |                        |
| Tubing           | ~\$100           | \$1           |                        |
|                  |                  |               | \$14.62                |

**Table S2.** Theoretical maximum EV recovery using PS and PMMA beads using the average EV size of 100 nm which closely aligns with the measured sizes of eluted EVs

|                                  | Diameter (m)       | Surface Area (m <sup>2</sup> ) | EV cross sectional area (m <sup>2</sup> ) | Number of beads in the 1x bead solution | Total number of EVs that can be collected | Maximum EV concentration (in 100 $\mu$ L elution buffer) |
|----------------------------------|--------------------|--------------------------------|-------------------------------------------|-----------------------------------------|-------------------------------------------|----------------------------------------------------------|
| Polystyrene (PS)                 | $1 \times 10^{-4}$ | $3.14 \times 10^{-8}$          | $7.85 \times 10^{-15}$                    | 218                                     | $8.72 \times 10^8$                        | $8.72 \times 10^9$ particle/mL                           |
| Poly(methyl methacrylate) (PMMA) | $4 \times 10^{-5}$ | $5.03 \times 10^{-9}$          | $7.85 \times 10^{-15}$                    | 1517                                    | $9.71 \times 10^8$                        | $9.71 \times 10^9$ particle/mL                           |

**Table S3.** Comparison of size number for EVs eluted from different antibody and bead combinations using a t-test

|                                        |                 |                                        |                 |                                        |                 |
|----------------------------------------|-----------------|----------------------------------------|-----------------|----------------------------------------|-----------------|
| Column B                               | PMMA-CD9        | Column B                               | PMMA-CD63       | Column B                               | PMMA-CD81       |
| vs.                                    | vs.             | vs.                                    | vs.             | vs.                                    | vs.             |
| Column A                               | PS-CD9          | Column A                               | PS-CD63         | Column A                               | PS-CD81         |
|                                        |                 |                                        |                 |                                        |                 |
| Unpaired t test                        |                 | Unpaired t test                        |                 | Unpaired t test                        |                 |
| P value                                | 0.7454          | P value                                | 0.1411          | P value                                | 0.7603          |
| P value summary                        | ns              | P value summary                        | ns              | P value summary                        | ns              |
| Significantly different (P < 0.05)?    | No              | Significantly different (P < 0.05)?    | No              | Significantly different (P < 0.05)?    | No              |
| One- or two-tailed P value?            | Two-tailed      | One- or two-tailed P value?            | Two-tailed      | One- or two-tailed P value?            | Two-tailed      |
| t, df                                  | t=0.3479, df=4  | t, df                                  | t=1.831, df=4   | t, df                                  | t=0.3267, df=4  |
|                                        |                 |                                        |                 |                                        |                 |
| How big is the difference?             |                 | How big is the difference?             |                 | How big is the difference?             |                 |
| Mean of column A                       | 106.8           | Mean of column A                       | 107.7           | Mean of column A                       | 105.9           |
| Mean of column B                       | 108.3           | Mean of column B                       | 103.9           | Mean of column B                       | 103.6           |
| Difference between means (B - A) ± SEM | 1.533 ± 4.407   | Difference between means (B - A) ± SEM | -3.833 ± 2.094  | Difference between means (B - A) ± SEM | -2.300 ± 7.041  |
| 95% confidence interval                | -10.70 to 13.77 | 95% confidence interval                | -9.647 to 1.980 | 95% confidence interval                | -21.85 to 17.25 |
| R squared (eta squared)                | 0.02937         | R squared (eta squared)                | 0.4559          | R squared (eta squared)                | 0.02599         |
|                                        |                 |                                        |                 |                                        |                 |
| F test to compare variances            |                 | F test to compare variances            |                 | F test to compare variances            |                 |
| F, DFn, Dfd                            | 44.88, 2, 2     | F, DFn, Dfd                            | 2.769, 2, 2     | F, DFn, Dfd                            | 1.474, 2, 2     |
| P value                                | 0.0436          | P value                                | 0.5307          | P value                                | 0.8083          |
| P value summary                        | *               | P value summary                        | ns              | P value summary                        | ns              |
| Significantly different (P < 0.05)?    | Yes             | Significantly different (P < 0.05)?    | No              | Significantly different (P < 0.05)?    | No              |
|                                        |                 |                                        |                 |                                        |                 |
| Data analyzed                          |                 | Data analyzed                          |                 | Data analyzed                          |                 |
| Sample size, column A                  | 3               | Sample size, column A                  | 3               | Sample size, column A                  | 3               |
| Sample size, column B                  | 3               | Sample size, column B                  | 3               | Sample size, column B                  | 3               |

**Table S4.** Comparison of particle number for EVs eluted from different antibody and bead combinations using a t-test

| Column B                               | PMMA-CD9            | Column B                               | PMMA-CD63             | Column B                               | PMMA-CD81            |
|----------------------------------------|---------------------|----------------------------------------|-----------------------|----------------------------------------|----------------------|
| vs.                                    | vs.                 | vs.                                    | vs.                   | vs.                                    | vs.                  |
| Column A                               | PS-CD9              | Column A                               | PS-CD63               | Column A                               | PS-CD81              |
| Unpaired t test                        |                     | Unpaired t test                        |                       | Unpaired t test                        |                      |
| P value                                | 0.5788              | P value                                | 0.7672                | P value                                | 0.6492               |
| P value summary                        | ns                  | P value summary                        | ns                    | P value summary                        | ns                   |
| Significantly different (P < 0.05)?    | No                  | Significantly different (P < 0.05)?    | No                    | Significantly different (P < 0.05)?    | No                   |
| One- or two-tailed P value?            | Two-tailed          | One- or two-tailed P value?            | Two-tailed            | One- or two-tailed P value?            | Two-tailed           |
| t, df                                  | t=0.6033, df=4      | t, df                                  | t=0.3169, df=4        | t, df                                  | t=0.4910, df=4       |
| How big is the difference?             |                     | How big is the difference?             |                       | How big is the difference?             |                      |
| Mean of column A                       | 21241481            | Mean of column A                       | 23105556              | Mean of column A                       | 21503915             |
| Mean of column B                       | 22130864            | Mean of column B                       | 24444444              | Mean of column B                       | 19759259             |
| Difference between means (B - A) ± SEM | 889383 ± 1474172    | Difference between means (B - A) ± SEM | 1338889 ± 4225426     | Difference between means (B - A) ± SEM | -1744656 ± 3553339   |
| 95% confidence interval                | -3203575 to 4982341 | 95% confidence interval                | -10392776 to 13070553 | 95% confidence interval                | -11610305 to 8120993 |
| R squared (eta squared)                | 0.08341             | R squared (eta squared)                | 0.02449               | R squared (eta squared)                | 0.05684              |
| F test to compare variances            |                     | F test to compare variances            |                       | F test to compare variances            |                      |
| F, DFn, Dfd                            | 1.603, 2, 2         | F, DFn, Dfd                            | 2.950, 2, 2           | F, DFn, Dfd                            | 4.559, 2, 2          |
| P value                                | 0.7684              | P value                                | 0.5064                | P value                                | 0.3598               |
| P value summary                        | ns                  | P value summary                        | ns                    | P value summary                        | ns                   |
| Significantly different (P < 0.05)?    | No                  | Significantly different (P < 0.05)?    | No                    | Significantly different (P < 0.05)?    | No                   |
| Data analyzed                          |                     | Data analyzed                          |                       | Data analyzed                          |                      |
| Sample size, column A                  | 3                   | Sample size, column A                  | 3                     | Sample size, column A                  | 3                    |
| Sample size, column B                  | 3                   | Sample size, column B                  | 3                     | Sample size, column B                  | 3                    |

**Table S5.** Comparison of particle number of EVs eluted from the beads collected from top and bottom channels of EV-Lev and EVs collected by ultracentrifuge using an ordinary one-way ANOVA.

|                                   |             |                           |                  |             |                  |     |   |           |    |
|-----------------------------------|-------------|---------------------------|------------------|-------------|------------------|-----|---|-----------|----|
| Number of families                | 1           |                           |                  |             |                  |     |   |           |    |
| Number of comparisons per family  | 3           |                           |                  |             |                  |     |   |           |    |
| Alpha                             | 0.05        |                           |                  |             |                  |     |   |           |    |
|                                   |             |                           |                  |             |                  |     |   |           |    |
| Tukey's multiple comparisons test | Mean Diff.  | 95.00% CI of diff.        | Below threshold? | Summary     | Adjusted P Value |     |   |           |    |
| Top vs. Bottom                    | -13056      | -478703458 to 478677347   | No               | ns          | >0.9999          | A-B |   |           |    |
| Top vs. UC                        | -1138915370 | -1617605772 to -660224968 | Yes              | ***         | 0.0002           | A-C |   |           |    |
| Bottom vs. UC                     | -1138902315 | -1617592717 to -660211913 | Yes              | ***         | 0.0002           | B-C |   |           |    |
|                                   |             |                           |                  |             |                  |     |   |           |    |
| Test details                      | Mean 1      | Mean 2                    | Mean Diff.       | SE of diff. | n1               | n2  | q |           | DF |
| Top vs. Bottom                    | 9834630     | 9847685                   | -13056           | 171450372   |                  | 4   | 4 | 0.0001077 | 9  |
| Top vs. UC                        | 9834630     | 1148750000                | -1138915370      | 171450372   |                  | 4   | 4 | 9.394     | 9  |
| Bottom vs. UC                     | 9847685     | 1148750000                | -1138902315      | 171450372   |                  | 4   | 4 | 9.394     | 9  |
|                                   |             |                           |                  |             |                  |     |   |           |    |
| Compact letter display            |             |                           |                  |             |                  |     |   |           |    |
| UC                                | A           |                           |                  |             |                  |     |   |           |    |
| Bottom                            | B           |                           |                  |             |                  |     |   |           |    |
| Top                               | B           |                           |                  |             |                  |     |   |           |    |

**Table S6.** Comparison of mean size for EVs eluted from the beads collected from top and bottom channels of EV-Lev and EVs collected by ultracentrifuge using an ordinary one-way ANOVA.

|                                        |            |                  |            |                  |     |    |        |  |    |
|----------------------------------------|------------|------------------|------------|------------------|-----|----|--------|--|----|
| Number of families                     | 1          |                  |            |                  |     |    |        |  |    |
| Number of comparisons per family       | 3          |                  |            |                  |     |    |        |  |    |
| Alpha                                  | 0.05       |                  |            |                  |     |    |        |  |    |
| Holm-Šidák's multiple comparisons test | Mean Diff. | Below threshold? | Summary    | Adjusted P Value |     |    |        |  |    |
| Top vs. Bottom                         | 0          | No               | ns         | >0.9999          | A-B |    |        |  |    |
| Top vs. UC                             | 4.125      | No               | ns         | 0.7914           | A-C |    |        |  |    |
| Bottom vs. UC                          | 4.125      | No               | ns         | 0.7914           | B-C |    |        |  |    |
| Test details                           | Mean 1     | Mean 2           | Mean Diff. | SE of diff.      | n1  | n2 | t      |  | DF |
| Top vs. Bottom                         | 105.3      | 105.3            | 0          | 4.742            | 4   | 4  | 0      |  | 9  |
| Top vs. UC                             | 105.3      | 101.2            | 4.125      | 4.742            | 4   | 4  | 0.8699 |  | 9  |
| Bottom vs. UC                          | 105.3      | 101.2            | 4.125      | 4.742            | 4   | 4  | 0.8699 |  | 9  |
| Compact letter display                 |            |                  |            |                  |     |    |        |  |    |
| Top                                    | A          |                  |            |                  |     |    |        |  |    |
| Bottom                                 | A          |                  |            |                  |     |    |        |  |    |
| UC                                     | A          |                  |            |                  |     |    |        |  |    |

## **Principle of Co-Isolation of Extracellular Vesicles Using Polymeric Beads and Magnetic Levitation:**

Magnetic levitation has proven to be a versatile tool for a variety of life science and biomedical applications<sup>1-3</sup>. It includes the utilization of micro and/or nano particles for biomolecule<sup>4,5</sup>, cell<sup>5</sup>, and virus detection<sup>6,7</sup> within a confined space between two opposing magnets. The levitation of these particles is determined by the interplay of two forces, the buoyancy force and magnetic force, which depend on the particle's density and magnetic susceptibility. The strength of the magnetic force is proportional to the difference between the magnetic susceptibility of the particle and its surrounding paramagnetic medium.<sup>4,8</sup> Polymer beads are inherently non-magnetic and tend to move away from higher magnetic field regions to lower (diamagnetic repulsion). Even though this effect is weak, it can be enhanced by submerging the particles in a paramagnetic agent, such as Gadolinium (Gd)<sup>9</sup>. Given the negligible the magnetic susceptibility of polymer beads compared to a paramagnetic medium with Gd, their levitation is solely based on their density: higher density polymer beads levitate closer to the bottom compared to their less dense counterparts<sup>4,9,10</sup> regardless of their size<sup>4</sup>. We leveraged this phenomenon to sort beads of different densities, each decorated with distinct surface markers to enable the co-isolation of different populations of extracellular vesicles.



### **“Theoretical Calculation of Maximum EV Binding for PS and PMMA beads:**

To eliminate the heterogeneity in EV size, we employed an approach using the average EV size of 100 nm (which closely aligns with the measured sizes of eluted EVs). Our analysis in Table S2 assumes a uniform and complete coverage of the bead surface with EVs. According to the theoretical maximum calculations, PS and PMMA beads could capture  $8.72 \times 10^8$  and  $9.71 \times 10^8$  particles, respectively.

In the validation experiments with pre-purified EVs, the initial particle concentration was  $8.50 \times 10^{10}$  particles/mL. Concurrently, the maximum theoretical EV concentration (from **Table S2**) was calculated as  $9.71 \times 10^9$  particles/mL for 40  $\mu$ m PMMA. The experimental particle concentrations after elution from the beads were:

PMMA-CD9:  $6.27 \times 10^8 \pm 1.01 \times 10^8$  particles/mL

PMMA-CD63:  $7.04 \times 10^8 \pm 1.93 \times 10^8$  particles/mL

PMMA-CD81:  $5.24 \times 10^8 \pm 2.88 \times 10^8$  particles/mL

We demonstrated the proof-of-principle for vesicle isolation using inexpensive polymer beads in a high-throughput, flow-based platform. The experimental results reveal a recovery yield  $\sim 1.3$  order of magnitude lower than the theoretical maximum EV concentration. This discrepancy can be attributed to the initial assumption of complete bead surface coverage with EVs, which differs from the practical challenges of achieving whole surface functionalization with antibodies at the correct orientation. The EV-Lev system can process thousands of beads simultaneously, enabling the potential isolation of billions of vesicles, as validated in our experiments. To further increase the rate of recovery from the initial solution, total surface area that captures EVs might be increased by increasing the total number of antibody-coated beads in the solution.

For instance, increasing the number of 40  $\mu$ m PMMA beads ten-fold to 15170, would theoretically allow capture of  $9.71 \times 10^9$  EVs total.

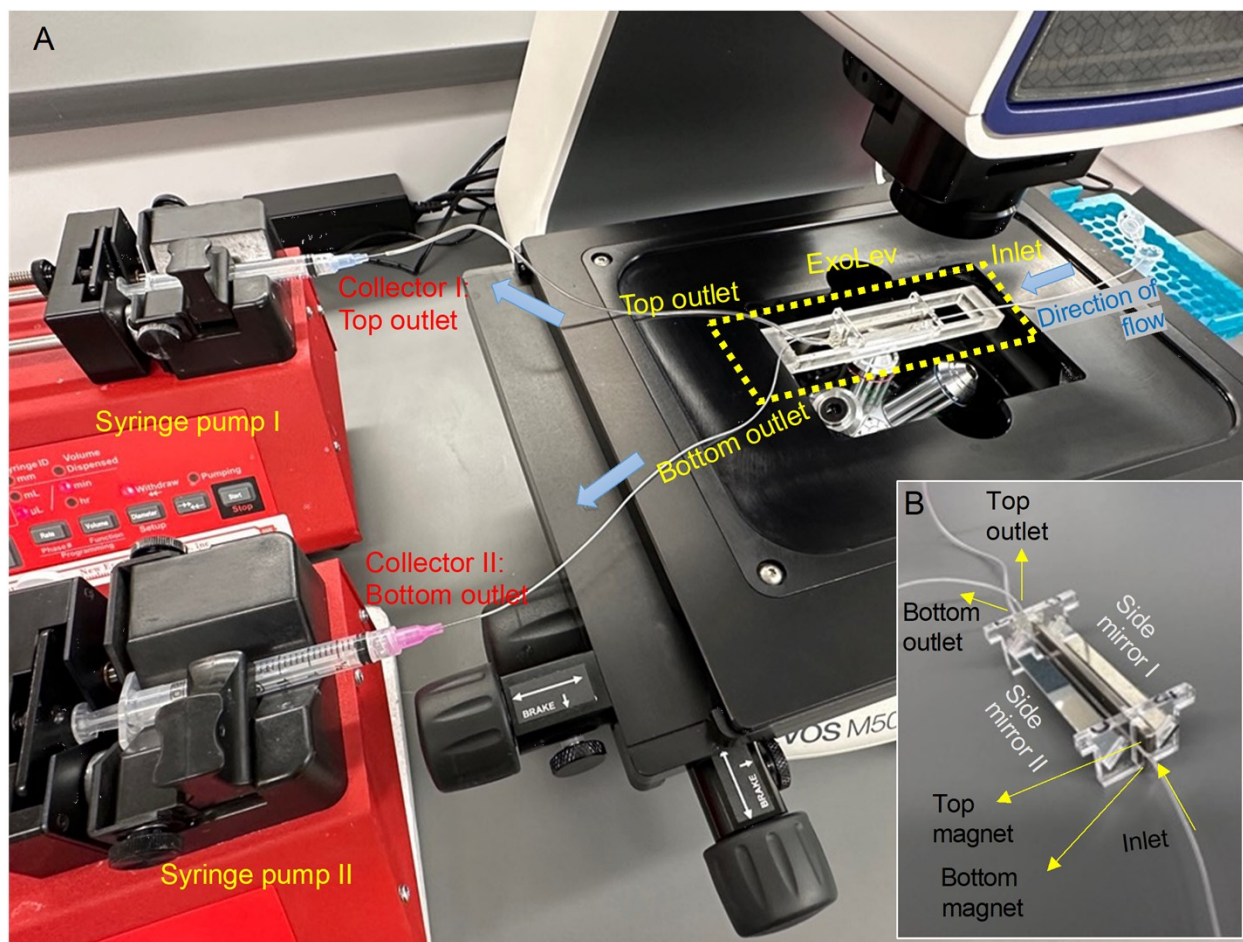

**Figure S1:** Photo of the EV-Lev-based sorting system. **A.** Top and bottom outlets are attached to two syringe pumps that operate at different flow rates. The EV-Lev platform is placed on a 3D printed holder that is mounted on an inverted microscope (EVOS M5000) and imaged during the sorting via two side-mirrors attached. **B.** Close-up photograph of EV-Lev sorter.

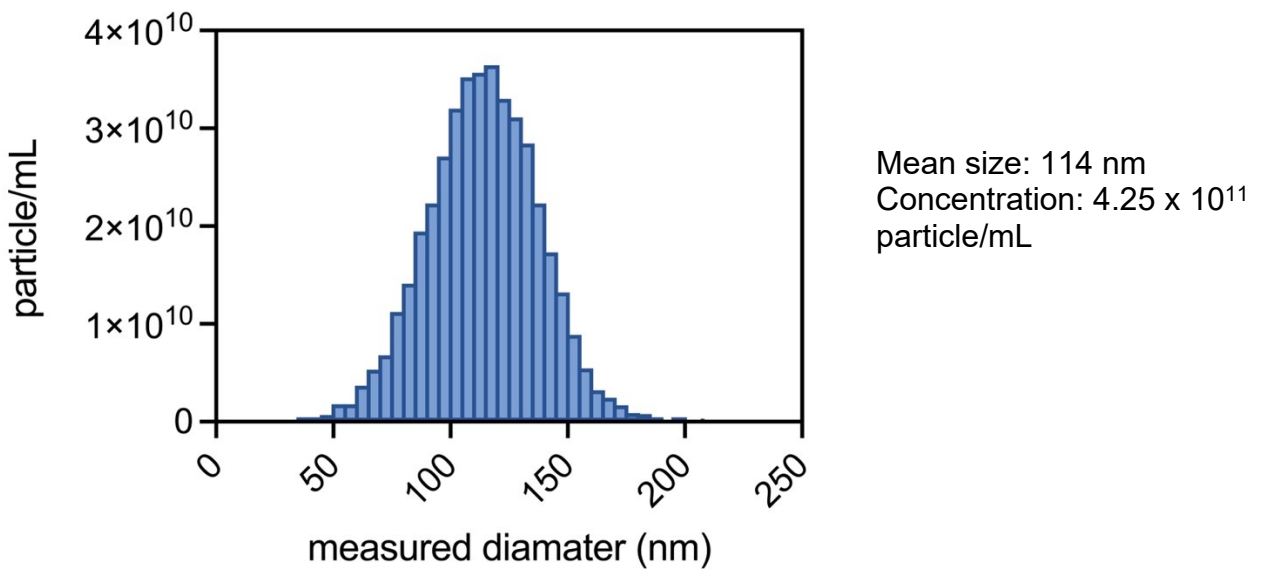

**Figure S2.** iSCAT analysis of particles collected after ExoTIC purification using 300  $\mu$ L of plasma.

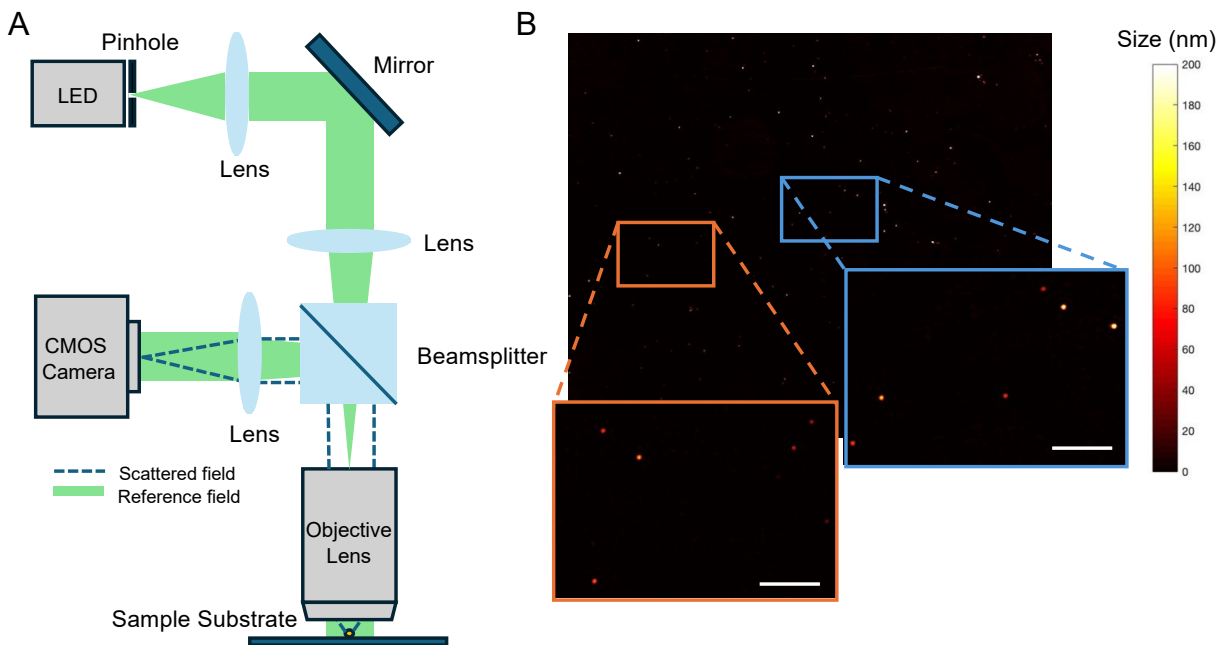

**Figure S3:** Interferometric scattering (iSCAT) microscopy measurements for EVs collected by EV-Lex. **A.** Schematic representation of configuration of the interferometric imaging system. **B.** Images of extracellular vesicles after elution from the beads. Scale bars: 5  $\mu\text{m}$

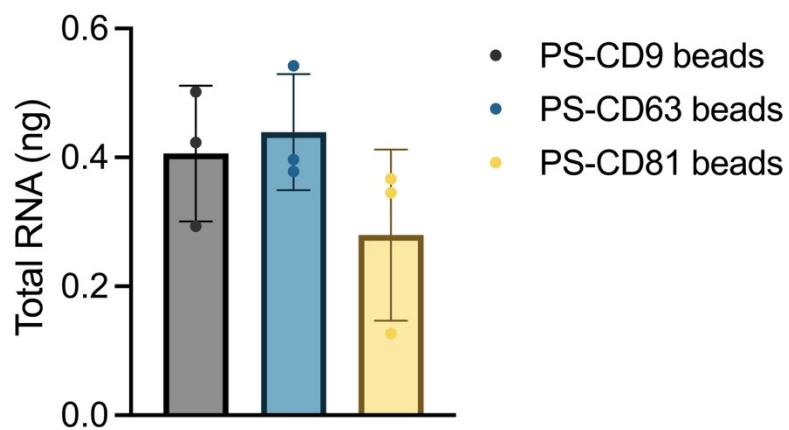

**Figure S4:** Total RNA content of eluting extracellular vesicles after the elution from Anti-CD9, -CD63, or CD81 beads using 20 µL of human plasma with 1 x of PS bead solution.

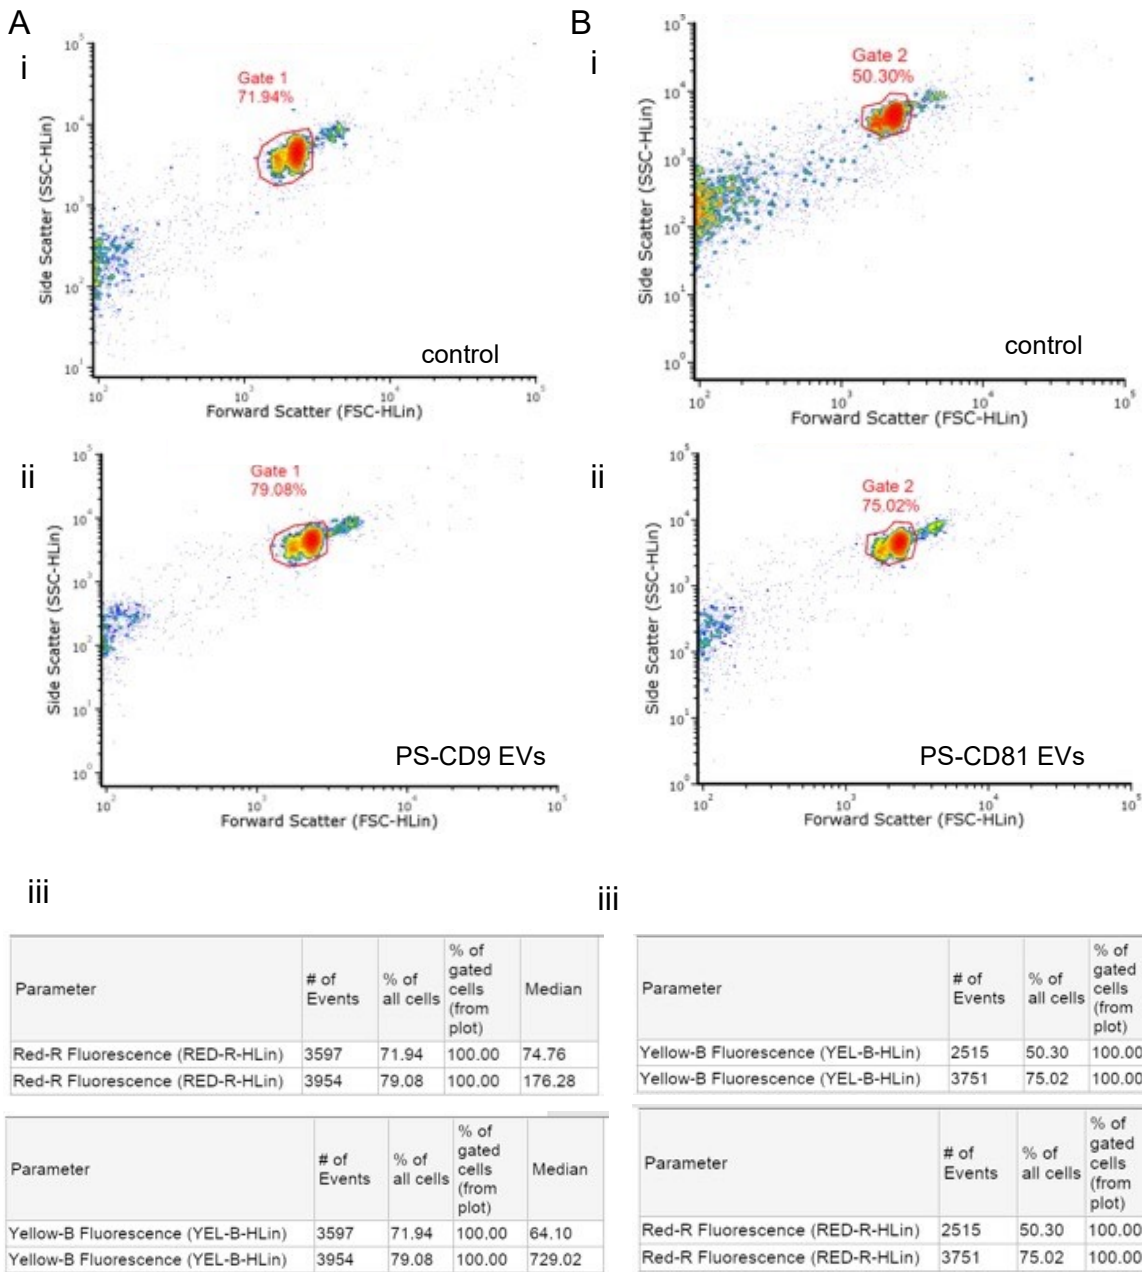

**Figure S5:** FC analysis of eluted from **A.** PS-CD9 or **B.** PS-CD81 beads. **i**, **ii**, and **iii** represent control, sample, and histogram statistics for each condition. Gate 1 and Gate 2 was set according to CD9 and CD81 magnetic bead populations in A-i and B-i, respectively. Red-Red or Yellow-Blue lasers were used for APC-CD9 or PE-CD81 stains, respectively.

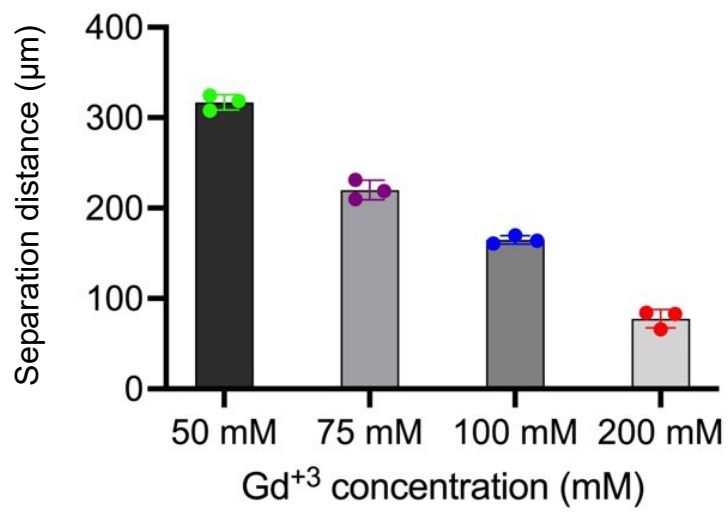

**Figure S6:** Separation distance of two different beads under different Gd concentrations

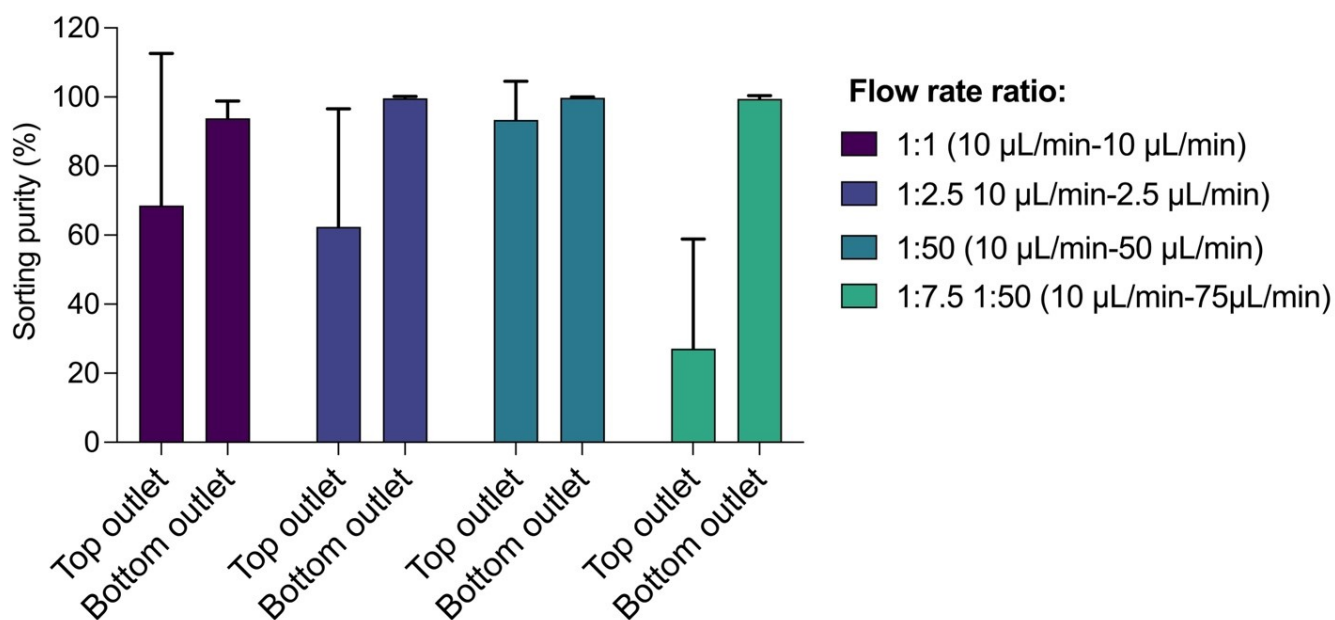

**Figure S7:** Optimization of flow rate in terms of top and bottom outlet purity for EV-Lev-based bead sorting at different flow rate ratios of bottom and top outlets using a mixture of streptavidin-coated PS and PMMA beads. Sorted polymer beads at top (PS) and bottom (PMMA) outlets placed in wells and counted to assess sorting purity.



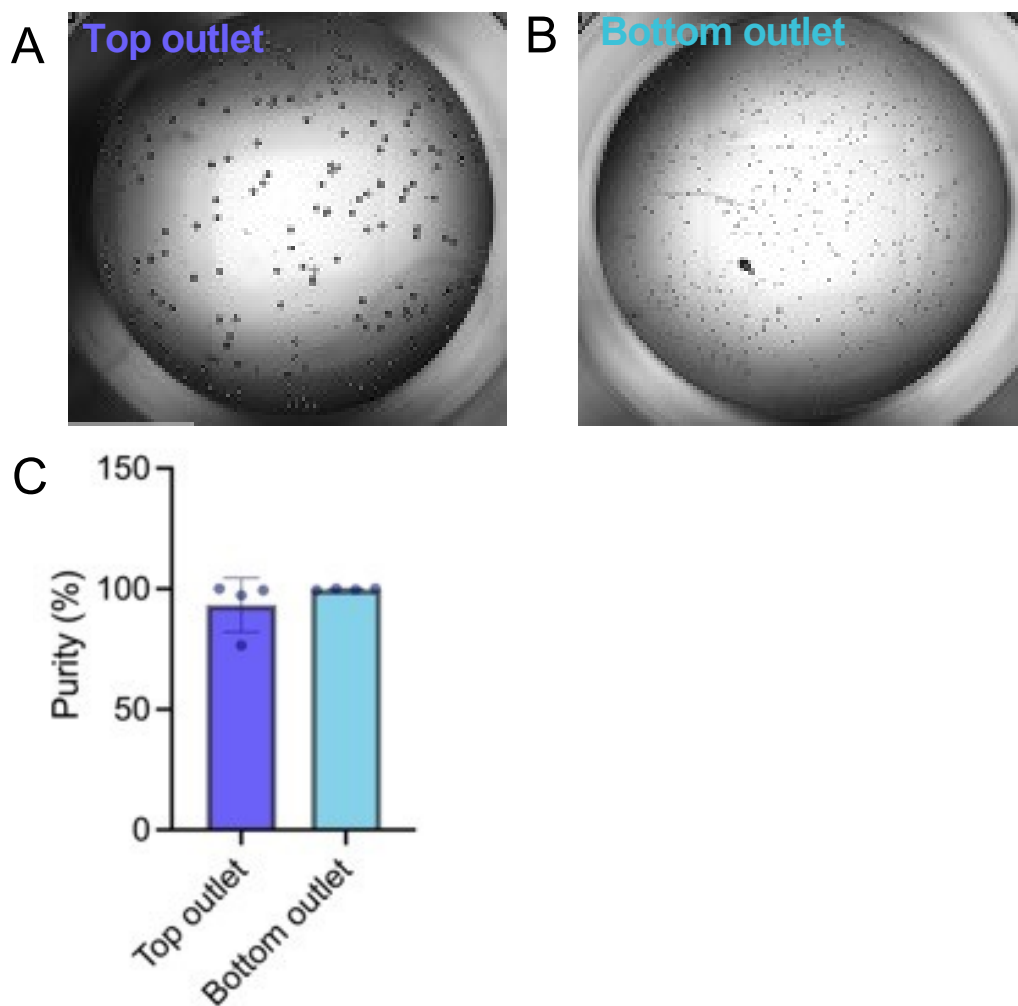

**Figure S8:** Sorted polymer beads at top and bottom outlets placed in wells and counted for purity for optimized flow rate: 50  $\mu\text{L}/\text{min}$  for top and 10  $\mu\text{L}/\text{min}$  for bottom channels, respectively. Photograph of the beads collected from **A.** top outlet and **B.** bottom outlet. **C.** Assessment of purity after the quantification of the beads from each outlet.

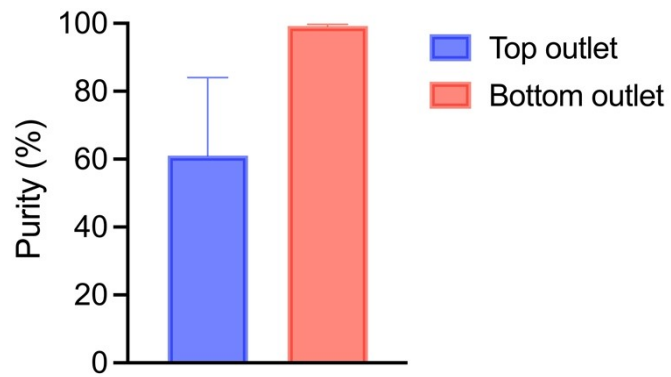

**Figure S9:** Sorting purity in top and bottom outlets after incubating human plasma sample with an anti-CD9 coated PS bead and anti-CD81 coated PMMA bead mixture.

# NANOSIGHT

450ul filtered plasma ultracentrifuge 1 2.5 dil 2023-09-05 15-09-59

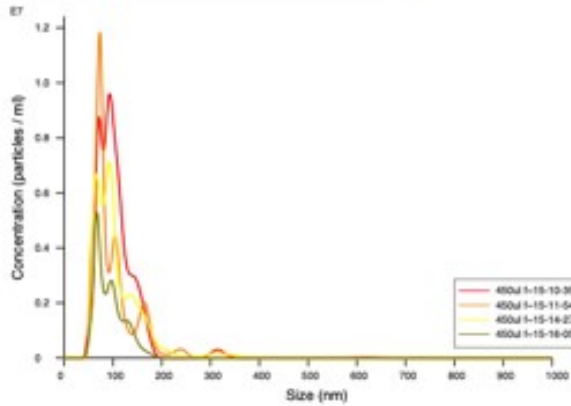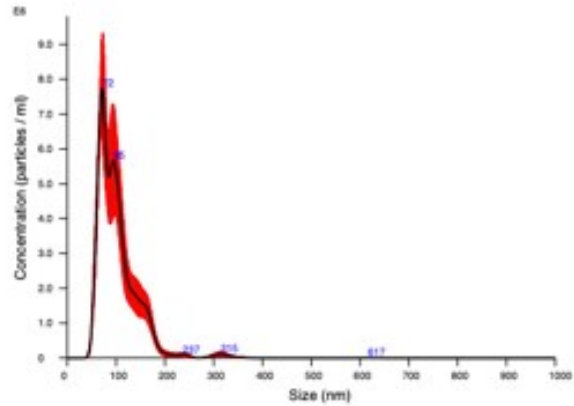

## Results

### Stats: Merged Data

Mean: 102.9 nm  
Mode: 71.1 nm  
SD: 44.1 nm  
D10: 63.7 nm  
D50: 93.0 nm  
D90: 155.4 nm

### Stats: Mean +/- Standard Error

Mean: 101.2 +/- 3.6 nm  
Mode: 81.6 +/- 6.8 nm  
SD: 41.2 +/- 4.5 nm  
D10: 63.5 +/- 1.5 nm  
D50: 90.3 +/- 3.5 nm  
D90: 153.4 +/- 6.8 nm  
Concentration:  
4.59e+08 +/- 8.36e+07 particles/ml  
25.1 +/- 4.6 particles/frame  
27.6 +/- 4.6 centres/frame

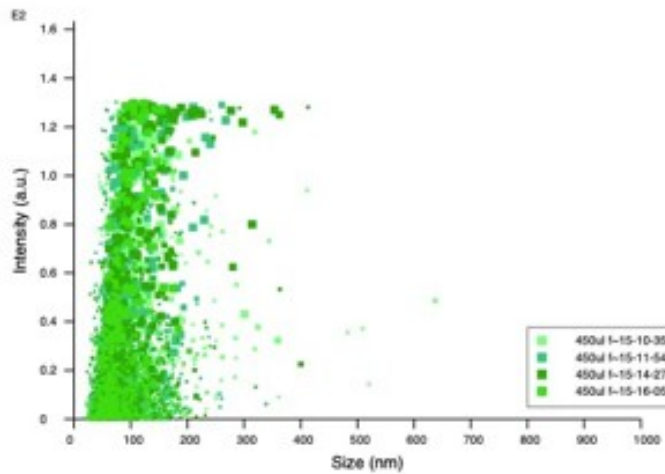

**Figure S10:** NTA measurement of EVs collected by ultracentrifuge using 450  $\mu$ L of plasma diluted in a 1:2.5 ratio.

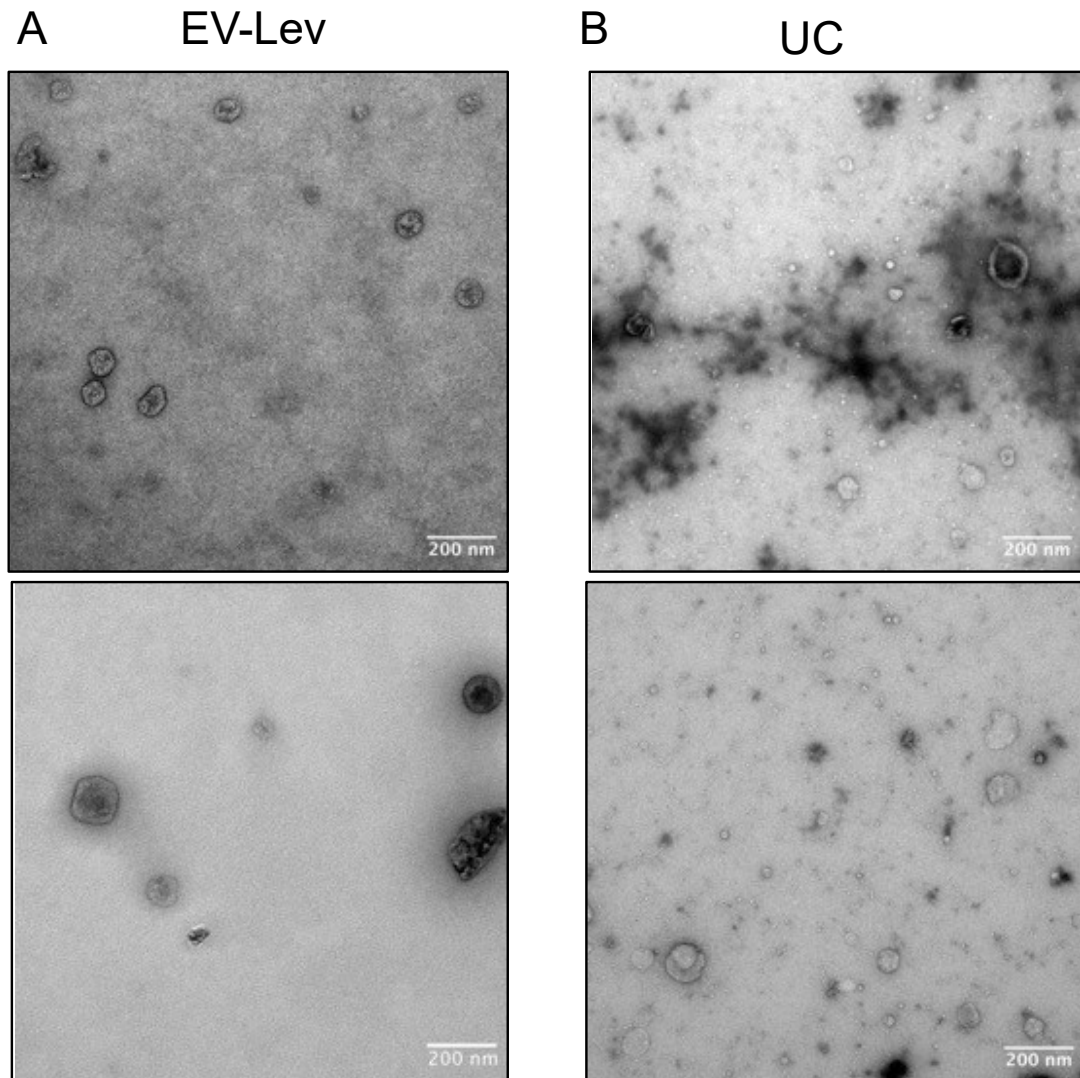

**Figure S11:** TEM images of extracellular vesicles collected by **A.** EV-Lev or **B.** Ultracentrifugation (UC). TEM images showing the much clean and uniform EVs isolated from human plasma using EV-Lev. In contrast, ultracentrifugation prepares EV in a mixture with small aggregates and debris. (Scale bars: 200 nm).

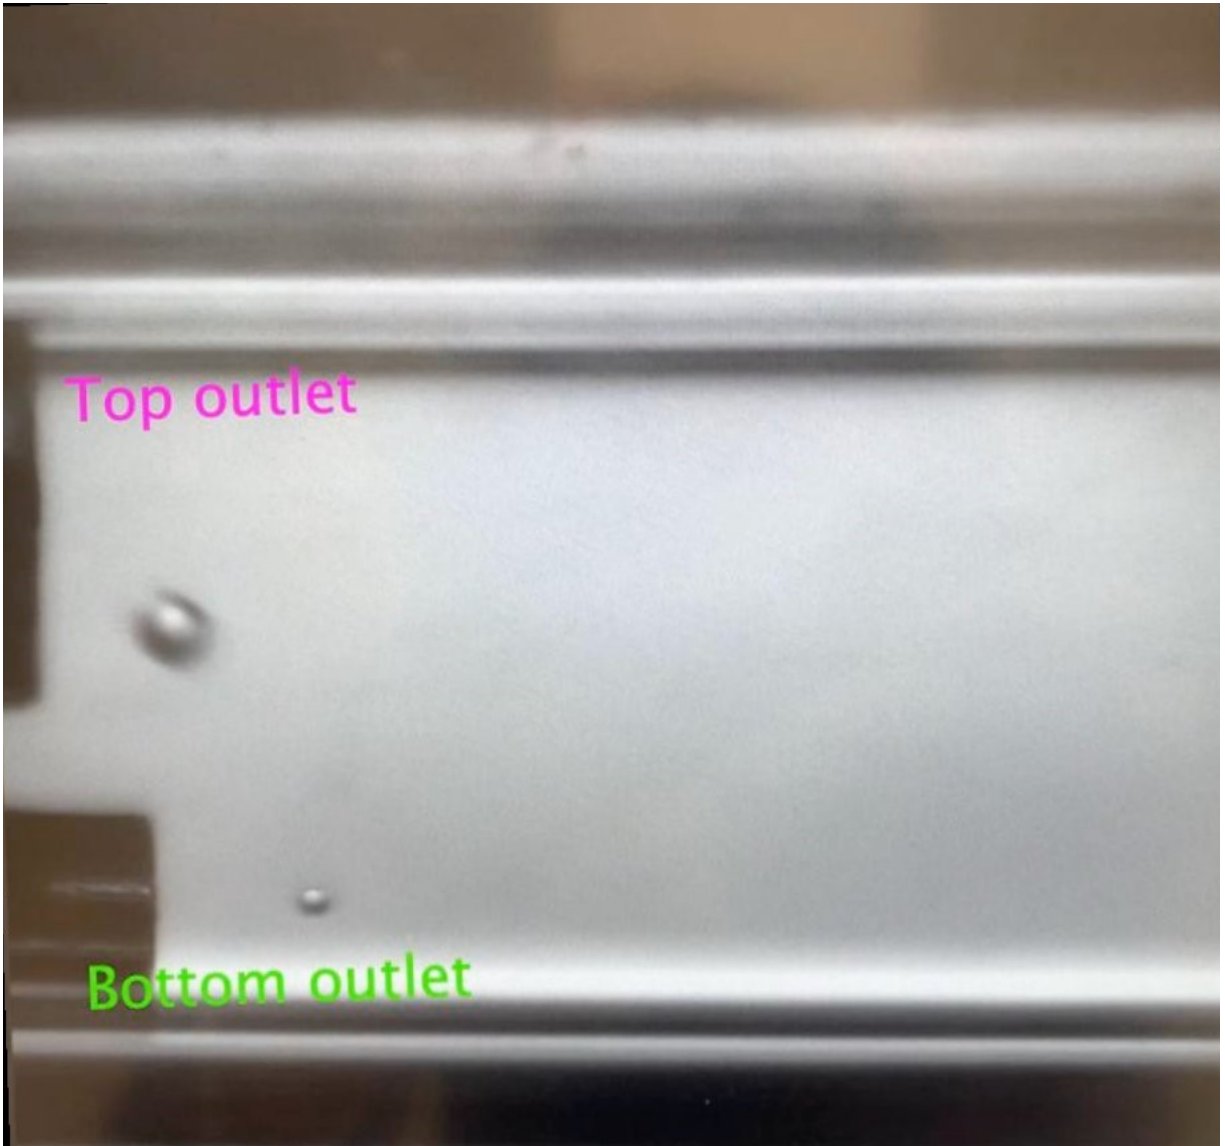

**Video S1:** Sorting of PS and PMMA mixture at 50  $\mu\text{L}/\text{min}$  and 10  $\mu\text{L}/\text{min}$  flow rates for top and bottom outlets, respectively, in a levitation media containing 0.01% of Pluronic and 75 mM Gd in PBS.

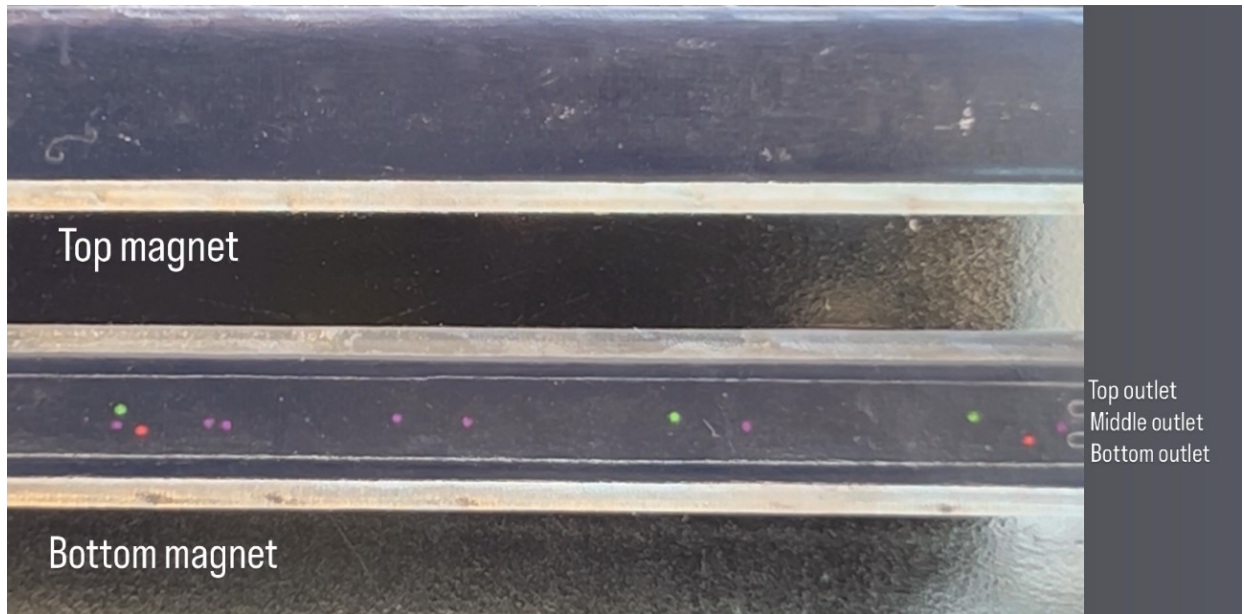

**Video S2:** To demonstrate the potential for isolating multiplex bead-EV complexes, we sorted three different standard density marker beads (green: 1.02, violet: 1.06, and red: 1.09 g mL<sup>-1</sup>) in a 3D-printed magnetic levitation platform. The beads were levitated in a medium containing 0.01% of Pluronic and 150 mM of Gd in PBS. Flow rates for top, middle, and bottom channel were 500  $\mu$ L/min, 200  $\mu$ L/min, and 400  $\mu$ L/min, respectively.

## References

- [1] Dabbagh SR, Alseed MM, Saadat M, Sitti M, Tasoglu S. Biomedical Applications of Magnetic Levitation. *Advanced NanoBiomed Research* 2022, 2 (3), 2100103.
- [2] Ge S, Nemiroski A, Mirica KA, Mace CR, Hennek JW, Kumar AA, Whitesides GM, Magnetic Levitation in Chemistry, Materials Science, and Biochemistry. *Angewandte Chemie International Edition* 2020, 59 (41), 17810-17855.
- [3] Ashkarran AA, Mahmoudi M, Magnetic Levitation Systems for Disease Diagnostics. *Trends in Biotechnology* 2021, 39 (3), 311-321.
- [4] Yaman S, Tekin HC, Magnetic Susceptibility-Based Protein Detection Using Magnetic Levitation. *Analytical Chemistry* 2020, 92 (18), 12556-12563.
- [5] Andersen MS, Howard E, Lu S, Richard M, Gregory M, Ogembo G, Mazor O, Gorelik P, Shapiro NI, Sharda AV, et al. Detection of membrane-bound and soluble antigens by magnetic levitation. *Lab Chip* 2017, 17 (20), 3462-3473.
- [6] Subramaniam AB, Gonidec M, Shapiro ND, Kresse KM, Whitesides GM, Metal-Amplified Density Assays, (MADAs), including a Density-Linked Immunosorbent Assay (DeLISA). *Lab on a Chip* 2015, 15 (4), 1009-1022.
- [7] Ozefe F, Arslan Yildiz A, Smartphone-assisted Hepatitis C detection assay based on magnetic levitation. *Analyst* 2020, 145 (17), 5816-5825.
- [8] Durmus NG, Tekin HC, Guven S, Sridhar K, Arslan Yildiz A, Calibasi G, Ghiran I, Davis RW, Steinmetz LM, Demirci U, Magnetic levitation of single cells. *Proc Natl Acad Sci U S A* 2015, 112 (28), E3661-3668.
- [9] Winkleman A, Perez-Castillejos R, Gudiksen KL, Phillips ST, Prentiss M, Whitesides GM, Density-based diamagnetic separation: devices for detecting binding events and for collecting unlabeled diamagnetic particles in paramagnetic solutions. *Analytical chemistry* 2007, 79 (17), 6542-6550.
- [10] Xie J, Zhao P, Zhang C, Fu J, Turng L.-S, Current state of magnetic levitation and its applications in polymers: A review. *Sensors and Actuators B: Chemical* 2021, 333, 129533.
